# Supplementary material for: Loading of chromenones on superparamagnetic iron oxide-modified dextran core–shell nanoparticles: openness to bind to β-cyclodextrin and DNA
Source: Royal Society of Chemistry journal article supplement (doi:10.1039/c5nj00921a), 2015-01-01
Supplement: c5nj00921a1.pdf [file c5nj00921a1.pdf]

## Supporting Information

**Loading of chromenones on superparamagnetic iron oxide–modified dextran core–shell nanoparticles. Openness to bind to  $\beta$ –cyclodextrin and DNA†**

**Sameena Yousuf,<sup>1\*</sup> Israel VMV Enoch,<sup>1\*</sup> Paulraj Mosae Selvakumar,<sup>1</sup> Dhanaraj Premnath<sup>2</sup>**

**New Journal of Chemistry**

**30.07.2015**

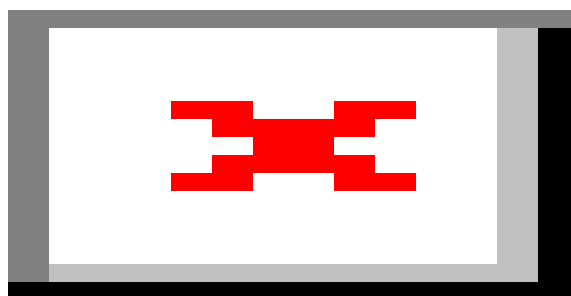

**SI 1** Molecular structure of chromenones (a) PC, (b) DC, (c) DHC, (d) BTC, and (e) BIC

**SI 2A** IR spectral data for dextran–coated and aminoethylamino–dextran–coated SPIONs

| Dextran–coated SPIONs         |                    | Aminoethylamino–dextran–coated SPIONs |                    |
|-------------------------------|--------------------|---------------------------------------|--------------------|
| 3433.64<br>(broad)            | –O–H str           | 3415.31<br>(broad)                    | –O–H str           |
| –                             | –                  | 3792.33                               | –N–H str           |
| 2764.46<br>2426.01<br>2362.37 | Aliphatic –C–H str | 2358.52<br>–                          | Aliphatic –C–H str |

|                            |                                                                            |                       |                                                                            |
|----------------------------|----------------------------------------------------------------------------|-----------------------|----------------------------------------------------------------------------|
| 1384.64                    | O–H in plane bending in coupling with –C–H wagging, In plane bending bands | 1383.68               | O–H in plane bending in coupling with –C–H wagging, In plane bending bands |
| 1117.55 to 1068.37         | –C–O str                                                                   | –                     | –C–O str                                                                   |
| 1597.73                    | –C=C str coupled with C–C str                                              | 1597.73               | –C=C str coupled with C–C str                                              |
| 838.88<br>600.72           | –C–H out of plane bending                                                  | –                     | –C–H out of plane bending                                                  |
| 535.1                      | Fe–O bonding                                                               | 550.5                 | Fe–O bonding                                                               |
| 498.50<br>476.33<br>434.86 | Due to dextran                                                             | 491.75<br>–<br>433.90 | Due to dextran                                                             |

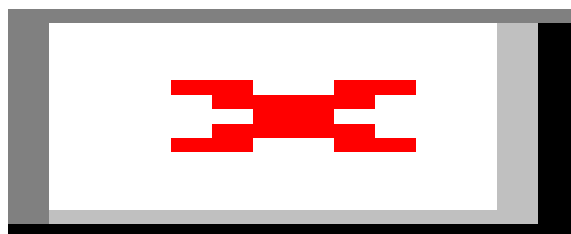

**SI 2B** IR spectra for (a) dextran-coated SPIONs and (b) aminoethylamino-dextran-coated SPIONs

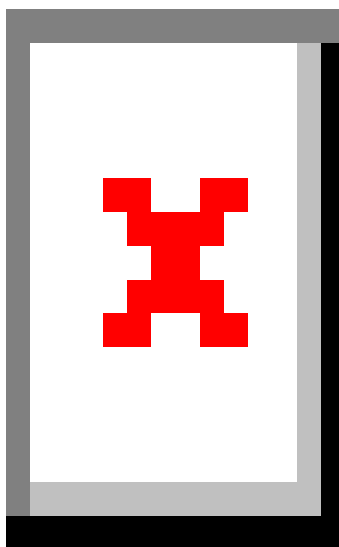

**SI 3** X-ray photoelectron spectra for the expanded spectra of aminoethylamino-modified dextran-coated SPIONs corresponding to (a) Fe 2p, (b) N 1s, (c) O 1s, (d) P 2p, and (e) C 1s

**SI 4** FTIR spectral data of free chromenones, and CHR-SPIONs

| CHRs | Types of Bonds                   | CHRs             | CHR-SPIONs      |
|------|----------------------------------|------------------|-----------------|
| PC   | O-H str                          | -                | 3357.46         |
|      | C=O                              | 1690.3           | 1688.37         |
|      | Aromatic C=C str                 | 1605.45,1530.24  | 1605.45         |
|      | C-O str coupled with C-H wagging | 1383.68,1321.96, | 1373.07,1302.68 |
|      |                                  | 1303.64,1148.4   | 1148.4          |
|      | Aliphatic C-H str                | 3039.26,2896.56  | 3039.26,2896.56 |
|      | Aliphatic C-H bend               | 1461.78          | 1460.81         |
|      | -C-OH str                        | -                | 1079.94,921.80  |

|    |                                                                                                                                   |                                     |                                     |
|----|-----------------------------------------------------------------------------------------------------------------------------------|-------------------------------------|-------------------------------------|
|    | Chelate compounds O–H str                                                                                                         | –                                   | 2360.44,2340.19                     |
|    | Deformation vibrations–C–H outside plane, related to substitution of aromatic rings of multi–ring compounds, N–H def out of plane | 800–500                             | 800–500                             |
|    | Fe–O bond stretching                                                                                                              | –                                   | ~548.6                              |
|    | N–H str                                                                                                                           | –                                   | 3790.4                              |
| DC | O–H str                                                                                                                           | 3496.94                             | 3302.5(broad)                       |
|    | C=O                                                                                                                               | 1631.78                             | 1630.52                             |
|    | Aromatic C=C str                                                                                                                  | 1587.42,1498.69                     | 1587.13,1512.88                     |
|    | C–O str and O–H in plane coupled with C–H wagging                                                                                 | 1400.32,1309.67,<br>1290.38,1180.44 | 1401.03,1365.35,<br>1277.61,1186.97 |
|    | Aliphatic C–H str                                                                                                                 | 3041.74,2964.59                     | 2973.7                              |
|    | Aliphatic C–H bend                                                                                                                | 1498.69                             | 1465.63                             |
|    | Chelate compounds O–H str                                                                                                         | 2357.01,2328.08                     | 2360.44,2340.19                     |
|    | –C–OH str                                                                                                                         | 1082,<br>1020,873,819               | 1435.74,1074.16,<br>1010.16,971.97  |
|    | Deformation vibrations–C–H outside plane, related to substitution of aromatic rings of multi–ring compounds, N–H def out of plane | 800–500                             | 800–500                             |
|    | Fe–O bond stretching                                                                                                              | –                                   | ~557.3                              |
|    | N–H str                                                                                                                           | –                                   | 3789.44                             |

|         |                                                                                                                                   |                                             |                                       |
|---------|-----------------------------------------------------------------------------------------------------------------------------------|---------------------------------------------|---------------------------------------|
| DHC     | O–H str                                                                                                                           | 3285.76 (broad)                             | 3263.93 (broad)                       |
|         | C=O                                                                                                                               | 1641.54                                     | 1640.16                               |
|         | Aromatic C=C str                                                                                                                  | 1497.30, a band merged with                 | 1517.7                                |
|         | C–O str and O–H in plane coupled with C–H wagging                                                                                 | C=O<br>1390.41,1311.86,                     | 1349.93,1312.32,<br>1250.61           |
|         | Aliphatic C–H str                                                                                                                 | 1253.2,1180.28                              | 2916.81                               |
|         | Aliphatic C–H bend                                                                                                                | 3115.29, 2919.55                            | 1467.56                               |
|         | Chelate compounds O–H str                                                                                                         | 1464.16                                     | 2360.44                               |
|         | –C–OH str                                                                                                                         | 2703.98,2622.35<br>1081.33,1013.21,         | 1084.76                               |
|         | Deformation vibrations–C–H outside plane, related to substitution of aromatic rings of multi–ring compounds, N–H def out of plane | 968.06<br>800–500                           | 800–500                               |
|         | Fe–O bond stretching                                                                                                              | –                                           | ~559.2                                |
| N–H str | –                                                                                                                                 | Merged with O–H                             |                                       |
| BTC     | C=O                                                                                                                               | 1710.55                                     | 1712.48                               |
|         | Aromatic C=C str                                                                                                                  | 1589.06,1511.92                             | 1589.06,1509.03                       |
|         | C–O str coupled with C–H wagging                                                                                                  | 1383.68,1348,                               | 1383.68,1348                          |
|         | Aliphatic C–H str                                                                                                                 | 1312.32,1259.29,                            |                                       |
|         | Aliphatic C–H bend                                                                                                                | 2924.52                                     | 3039.26, 2935                         |
|         | Chelate compounds O–H str                                                                                                         | 1466.6                                      | 1414.53                               |
|         | –C–N str                                                                                                                          | 2360.44,2340.19                             | 2357,2335                             |
|         | –C–OH str                                                                                                                         | 1132.01                                     | 1130.87                               |
|         | Deformation vibrations–C–H outside plane, related to substitution of aromatic rings of multi–ring compounds, N–H def out of plane | 1076.08,1013.41<br>938.19,818.63<br>800–500 | 1076.08,939.163,<br>818.63<br>800–500 |
|         | Fe–O bond stretching                                                                                                              | –                                           | ~548.6                                |
| N–H str | –                                                                                                                                 | 3454.85 (broad),<br>Merged with O–H         |                                       |
| BIC     | C=O                                                                                                                               | 1709.59                                     | 1725.98                               |

|                                                                                                                                            |                  |                                   |
|--------------------------------------------------------------------------------------------------------------------------------------------|------------------|-----------------------------------|
| Aromatic C=C str                                                                                                                           | 1592.91, 1530.24 | 1591.95,1530.24                   |
| C-O str coupled with C-H wagging                                                                                                           | 1383.68,1354.75  | 1383.68,1311.36                   |
|                                                                                                                                            | 1252.54          | 1253.5                            |
| Aliphatic C-H str                                                                                                                          | 2970.8,2907.16   | 3045.05,2930.31                   |
| Aliphatic C-H bend                                                                                                                         | 1467.56          | 1468.53                           |
| Chelate compounds O-H str                                                                                                                  | 2359.48,2339.23  | 2360.44,2340.19                   |
| -C-N str                                                                                                                                   | 1137.12          | 1134.96                           |
| -C-OH str                                                                                                                                  | 818.63           | 1012.45, 973.87,<br>915.05,819.59 |
|                                                                                                                                            | 800-500          | 800-500                           |
| Deformation vibrations-C-H outside plane,<br>related to substitution of aromatic rings of<br>multi-ring compounds, N-H def out of<br>plane |                  |                                   |
| Fe-O bond stretching                                                                                                                       | -                | ~547.6                            |
| N-H str                                                                                                                                    | 3343             | 3338.18, 3789.4                   |

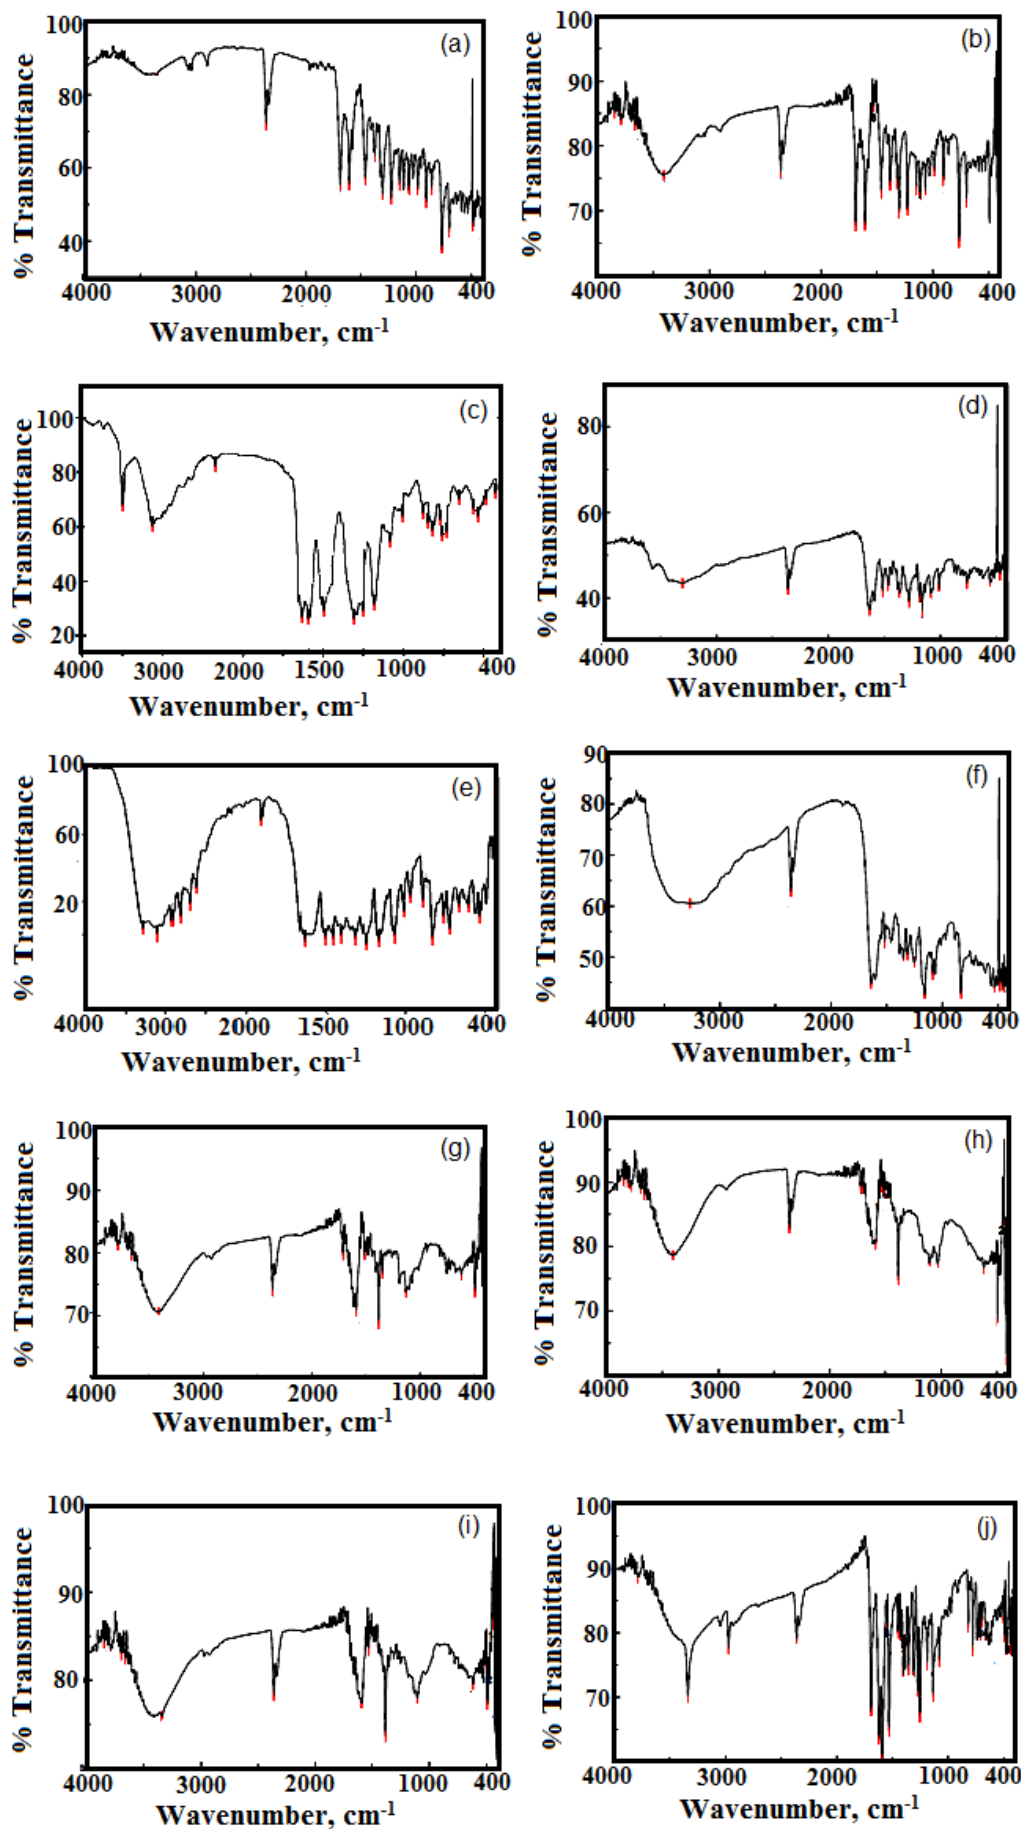

SI 5 FTIR spectra of Chromenones and Chromenones conjugated onto SPIONs of (a-b) PC, (c-d) DC, (e-f) DHC, (g-h) BTC, and (i-j) BIC

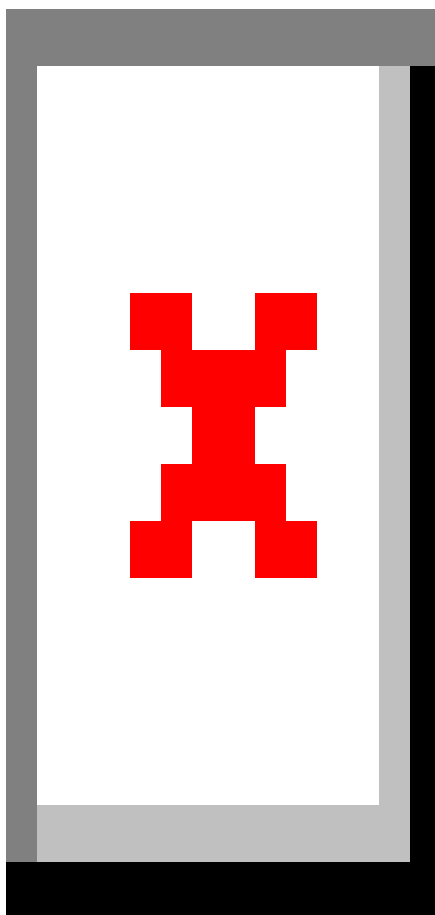

**SI 6** Molecular docking poses of complex of oligomeric part of dextran (Blue) and CHR (Dark brown) (a) PC, (b) DC, (c) DHC, (d) BTC, and (e) BIC (Hydrogen binding---and Atom-atom interaction ---)



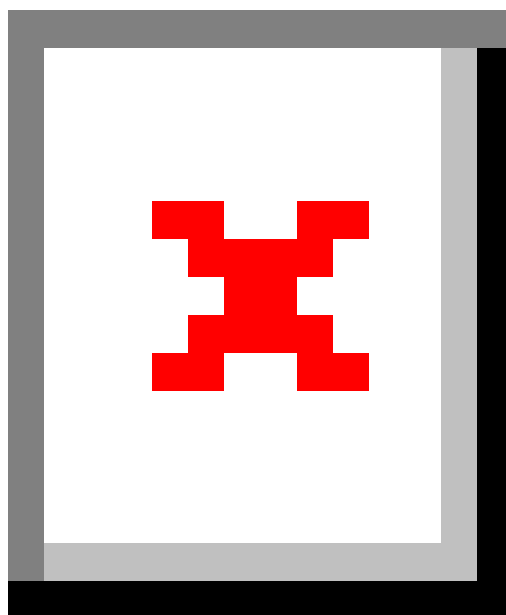

**SI 7** Molecular docking poses of complex of oligomeric part of aminoethylamino-dextran (Blue) and CHR (Dark brown) (a) DC, (b) DHC, (c) BTC, and (d) BIC (Hydrogen binding --- and Atom-atom interaction ---)

**SI8** Docking and  $E_{\text{model}}$  score of oligomeric part of dextran and aminoethylamino-dextran

| CHRs | Dextran (Kcal mol <sup>-1</sup> ) |                          | Aminoethylamino attached dextran(Kcal mol <sup>-1</sup> ) |                          |
|------|-----------------------------------|--------------------------|-----------------------------------------------------------|--------------------------|
|      | Docking score                     | $E_{\text{model}}$ score | Docking score                                             | $E_{\text{model}}$ score |
| PC   | 0.640                             | -24.021                  | -                                                         | -                        |
| DC   | -1.357                            | -32.471                  | -2.55291                                                  | -31.8915                 |
| DHC  | -0.710                            | -28.494                  | -1.09581                                                  | -32.3933                 |
| BTC  | -0.500                            | -40.389                  | -0.46448                                                  | -38.0988                 |
| BIC  | -0.886                            | -29.441                  | -0.65794                                                  | -41.3116                 |

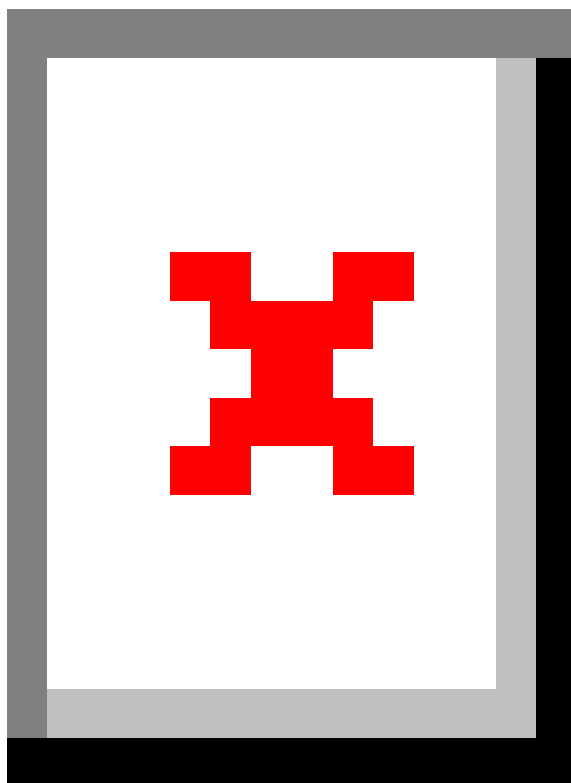

**SI 9** Energy dispersive X-ray spectra of (a) naked Iron oxide, (b) dextran-coated SPIONs, (c) aminoethylamino-dextran-coated SPIONs,<sup>1</sup> and of CHR-SPIONs of (d) PC, (e) DC, (f) DHC, (g) BTC, (h) BIC

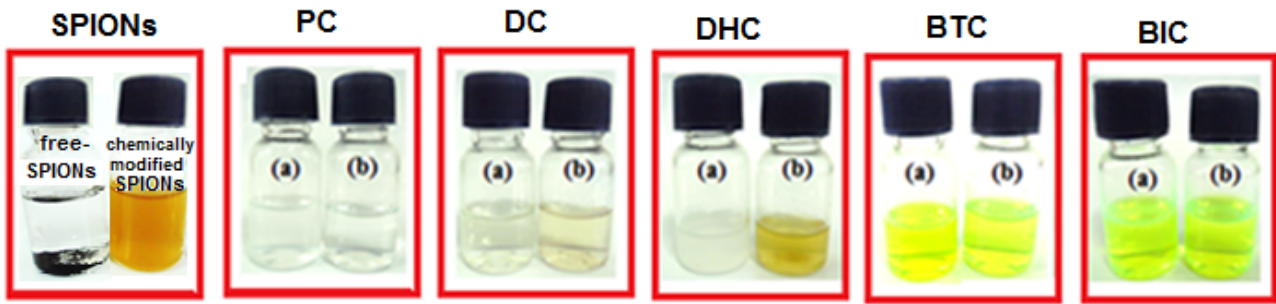

**SI 10** Photographic images for the dispersion of free-SPIONs, chemically modified SPIONs, chromenones and the corresponding chromenones conjugated onto chemically modified SPIONs of PC, DC, DHC, BTC, BIC in aqueous medium

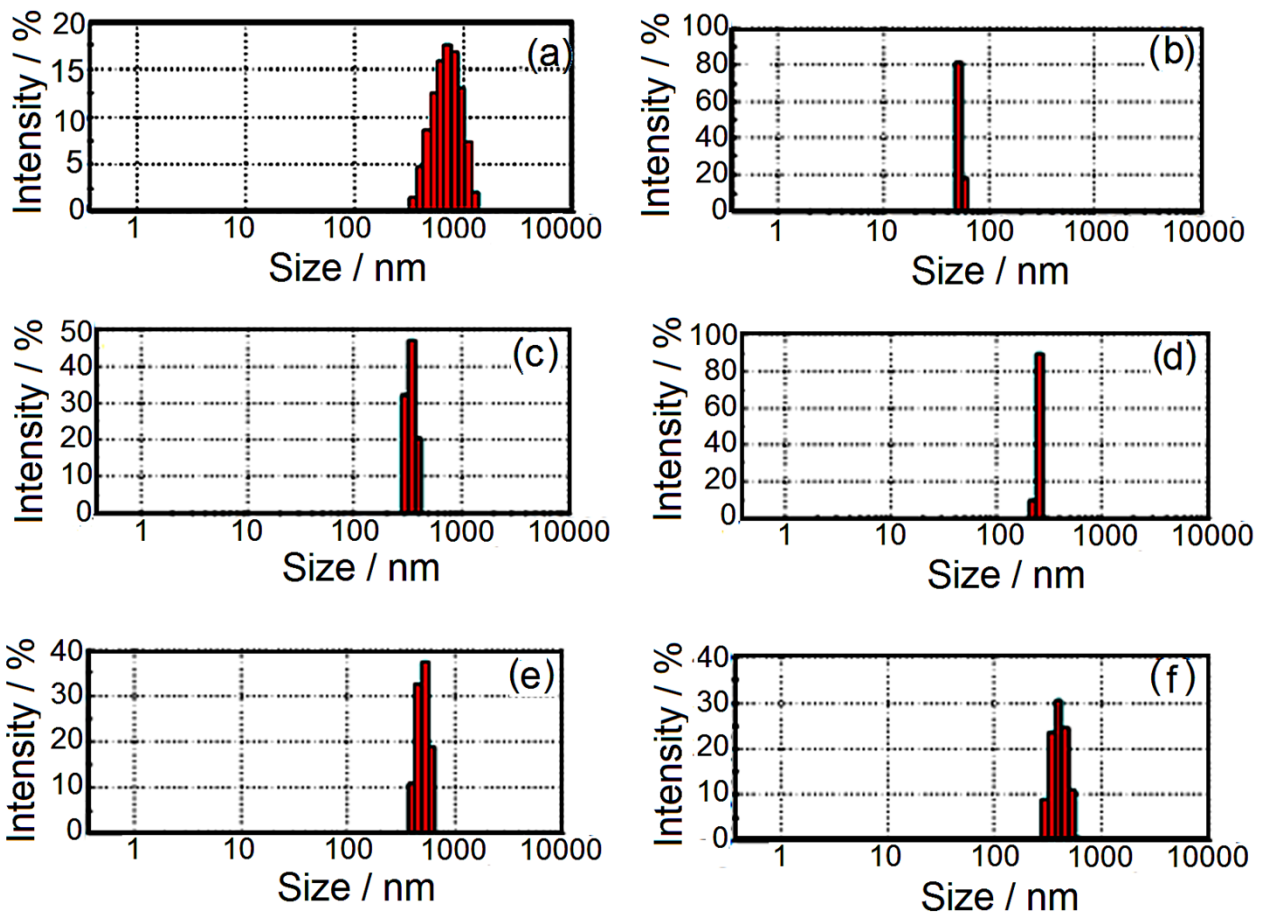

**SI 11** Size distributions of (a) aminoethylamino–dextran–coated SPIONs, and CHR–SPIONs of (b) PC, (c) DC, (d) DHC, (e) BTC, and (f) BIC

**SI 12** Particle size and magnetic properties of aminoethylamino–modified dextran–coated SPIONs and CHR–SPIONs

| Sample                                         |     | Particle diameter<br>nm | Coercivity, $H_c$ (G) | $M_S$ (emu/g) | $M_R$ (emu/g) |
|------------------------------------------------|-----|-------------------------|-----------------------|---------------|---------------|
| Aminoethylamino–modified dextran–coated SPIONs |     | 723.7                   | 0.65                  | 0             | 0             |
| CHR– SPIONs                                    | PC  | 52.2                    | 3.34                  | 4.94          | 0             |
|                                                | DC  | 338.0                   | 0.72                  | 0             | 0             |
|                                                | DHC | 251.5                   | 0.74                  | 1.75          | 0             |
|                                                | BTC | 508.6                   | 0.61                  | 62.31         | 0             |
|                                                | BIC | 564.4                   | 2.04                  | 4.44          | 0             |

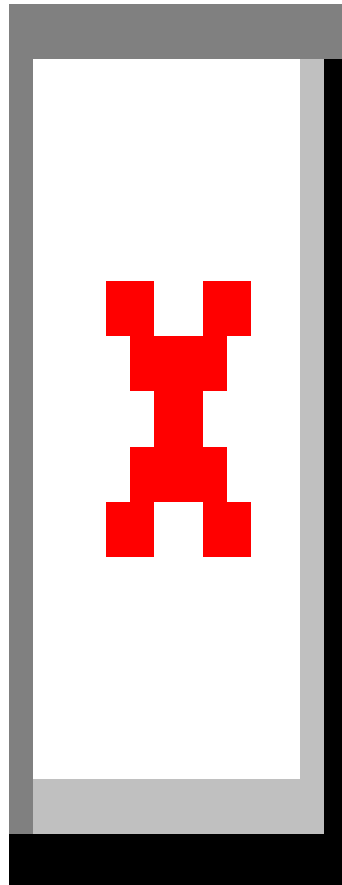

**SI 13** X-ray diffraction patterns of (a) SPIONs, (b) Dextran and chromenones and their aminoethylamino-dextran-coated SPIONs conjugates (IO-DX) of (c) PC, (d) DC, (e) DHC, (f) BTC, and (g) BIC

**SI14** Major peaks of CHRs, Dextran, SPIONs, and CHR–SPIONs

| Compounds                                              | 2 $\theta$ (deg)                    |                                          |
|--------------------------------------------------------|-------------------------------------|------------------------------------------|
|                                                        | Free CHRs                           | CHR–SPIONs                               |
| PC                                                     | 9.4244,<br>16.4884<br>18.1424       | 9.3179<br>10.7185<br>25.7757<br>31.9277  |
| DC                                                     | 14.2889<br>16.7263<br>26.0235       | 24.0800<br>27.4000<br>31.1000            |
| DHC                                                    | 15.4788<br>20.1134<br>23.4927       | 11.0046<br>12.0238<br>17.9630<br>26.8000 |
| BTC                                                    | 10.2000<br>13.4032<br>15.9126       | 13.1084<br>13.8601<br>20.8082            |
| BIC                                                    | 7.3910<br>14.4279<br>24.0022        | 14.0425<br>23.5801<br>24.8892<br>26.0000 |
| Free SPIONs                                            | 17.5000, 25.7000, 30.4480, 35.9403, |                                          |
| Aminoethylamino–<br>modified dextran–<br>coated SPIONs | 15.8733, 23.7824, 25.7000, 26.8550  |                                          |
| Dextran                                                | 12.6377, 21.1328, 27.2091           |                                          |

**SI15** Crystallite size and Strain parameter of CHRs, SPIONs, and CHRs–SPIONs

| Molecule                              | XRD Crystallite size in nm<br>with Strain ( $\epsilon$ ) |              |
|---------------------------------------|----------------------------------------------------------|--------------|
|                                       | Free CHR                                                 | CHR–SPIONs   |
| SPIONs                                | 18 (0.0091)                                              |              |
| dextran–coated SPIONs                 | 10 (0.0037)                                              |              |
| Aminoethylamino–dextran–coated SPIONs | 45 (0.00037)                                             |              |
| PC                                    | 20 (0.00056)                                             | 40 (0.0004)  |
| DC                                    | 25 (0.00041)                                             | 36 (0.00094) |
| DHC                                   | 23 (0.00048)                                             | 37 (0.0005)  |
| BTC                                   | 43 (0.00045)                                             | 34 (0.00014) |
| BIC                                   | 40 (0.00050)                                             | 38 (0.00063) |

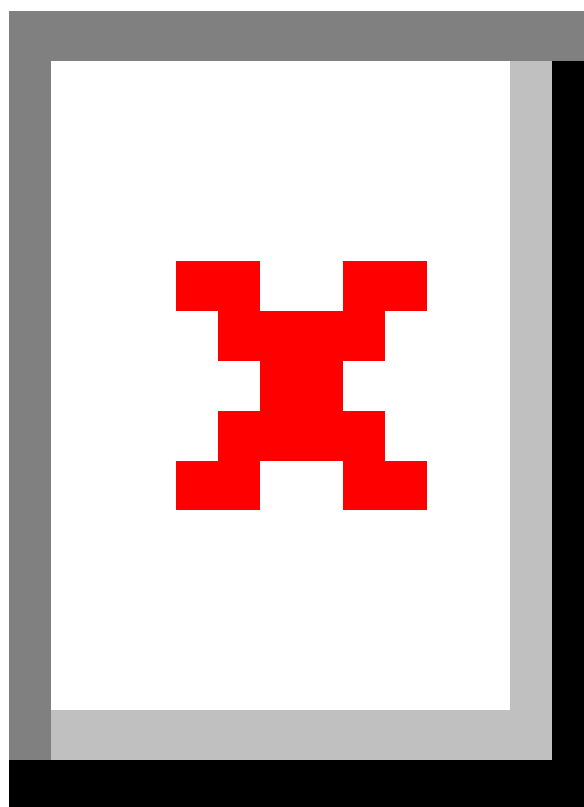

**SI16** (a) Fluorescence spectra of PC loaded on CHR-SPIONs at varying concentrations of  $\beta$ -CD. Inset: The plot of  $[\beta\text{-CD}]$  vs.  $I_0/I$ , (b) The plot of  $1/[\beta\text{-CD}]$  vs.  $F_0/\Delta F$  for the fluorescence spectra of PC loaded on CHR-SPIONs at varying concentrations of  $\beta$ -CD, (b) Fluorescence spectra of DC loaded on CHR-SPIONs at varying concentrations of  $\beta$ -CD. Inset: The plot of  $1/[\beta\text{-CD}]$  vs.  $1/(I-I_0)$ , (c) Fluorescence spectra of DHC loaded on CHR-SPIONs at varying concentrations of  $\beta$ -CD. Inset: The plot of  $1/[\beta\text{-CD}]^2$  vs.  $1/(I-I_0)$ , (d) Fluorescence spectra of BTC loaded on CHR-SPIONs at varying concentrations of  $\beta$ -CD. Inset: The plot of  $1/[\beta\text{-CD}]$  vs.  $1/(I-I_0)$ , and (e) Fluorescence spectra of BIC loaded on CHR-SPIONs at varying concentrations of  $\beta$ -CD. Inset: The plot of  $1/[\beta\text{-CD}]$  vs.  $1/(I-I_0)$ .



**SI 17** Absorption and fluorescence spectral data of CHR–SPIONs on ctDNA binding

| CHR <sub>s</sub> | CHR–SPION <sub>s</sub>  |          |                           |          |
|------------------|-------------------------|----------|---------------------------|----------|
|                  | Absorption Maximum (nm) |          | Fluorescence Maximum (nm) |          |
|                  | Water                   | DNA      | Water                     | DNA      |
| PC               | 255, 321                | 256, 321 | 280, 413                  | 281, 414 |
| DC               | 286, 381                | 282, 380 | 318                       | 314      |
| DHC              | 287                     | 281      | 363                       | 363      |
| BTC              | 267, 468, 511           | 259, 456 | 511                       | 509      |
| BIC              | 264, 469                | 264, 471 | 510                       | 511      |

**SI18** Binding constant values of CHR–SPIONs on DNA binding

| CHR loaded on modified SPION <sub>s</sub> | K (M <sup>-1</sup> ) |
|-------------------------------------------|----------------------|
| PC                                        | $7.33 \times 10^5$   |
| DC                                        | $8.20 \times 10^5$   |
| DHC                                       | $2.09 \times 10^4$   |
| BTC                                       | $8.20 \times 10^4$   |
| BIC                                       | $1.06 \times 10^5$   |

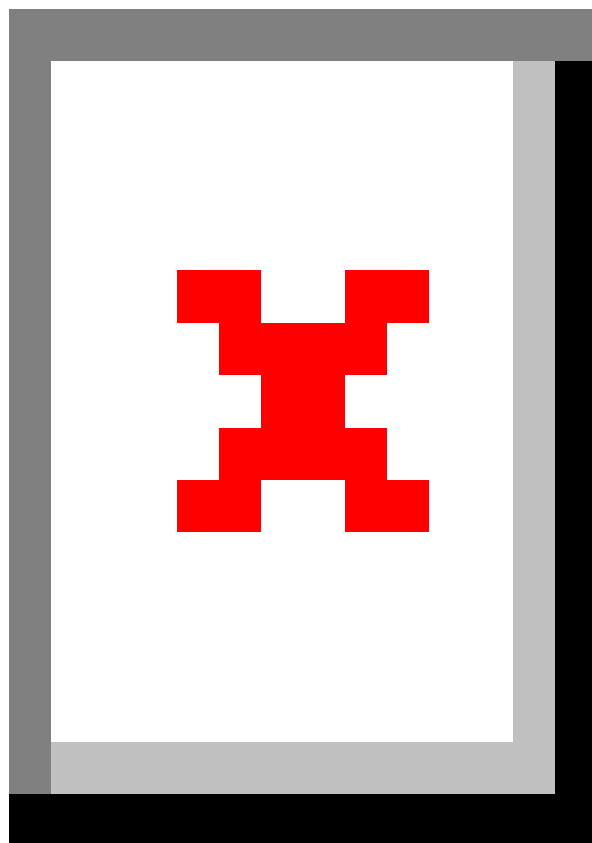

**SI 19** Fluorescence spectra of CHR loaded on CHR-SPIONs at varying concentrations of DNA (a) PC, (b) DC, (c) DHC, (d) BTC, and (e) BIC. Inset: The plot of [DNA] versus  $I_0/I$

## SI 20. Experimental

### Molecular docking

The molecular structure of the model oligomers of dextran and aminoethylamino modified dextran<sup>2</sup> was uploaded into Schrodinger Maestro software V 9.6 environment.<sup>3,4</sup> To get a proper binding affinity and molecular interaction, the receptor had to be prepared in the way of minimizing energy and potentially the molecule were fixed. The molecular receptor was prepared using the preparation work flow. All the hydrogens were added to the receptor to minimize the receptor structure with OPLS 2005 force field and the molecular mechanics engine setting was having a maximum root mean square deviation (RMSD) of 0.30 Å.<sup>5,6</sup> The energy minimization was performed constraining the heavy molecular atoms with the hydrogen torsion parameters turned off, to permit free rotation of the hydrogen atom. Bio-pharmacological properties of the ligands (CHR-SPIONs) were analyzed through Lipinski rule of five.<sup>7</sup> The compounds having less property value of Lipinski rule were restudied to obey the rule. The compounds with biologically active functional group were eliminated by applying reactive filter parameters.<sup>8</sup> After ensuring that the receptor and the ligand were in accurate forms of docking, the receptor grid files were generated and centered the allosteric site residues. To reduce the potential for non-polar parts of the receptor, Van der Waals radii of the receptor atoms were scaled to 1.00 Å with a partial atomic charge of 0.27. A grid box of six maintained at 40 Å × 60 Å × 40 Å, was engaged on the primed receptor structure by selecting allosteric site receptor structure of dextran and aminoethylamino functionalized dextran groups. A three phased subsequent molecular docking was performed to know the molecular interaction. Glide high throughput virtual screening (HTVS), standard precision (SP), and extra precision (XP) methods were followed.<sup>9,10</sup> The XP docking method is highly accurate and offer more poses for all each ligands during docking method and reports the best pose based on the energy term,  $E_{\text{model}}$ . The best pose of each ligand was further ranked based on the energy term  $E_{\text{model}}$ . The lowest XP glide score for a ligand indicates the best binding affinity towards the receptor. The cut off XP Glide score was set up as 0 Kcal mol<sup>-1</sup>.

### References:

- 1 Y. Sameena, I. V.M.V. Enoch, P. M. Selvakumar, D. Premnath, *Colloids Surf. B*, 2015, doi:10.1016/j.colsurfb.2015.07.049.
- 2 G. Du, Z. Liu, X. Xia, L. Jia, Q. Chu, S. Zhang, *Nanoscience* 2006, **11**, 49–54.
- 3 R. A. O’Friesner, R. B. Murphy, M. P. Repasky, L. L. Frye, J. R. Greenwood, T. A. Halgmen, P. C. Sanschargin, D. T. Mainz, *J. Med. Chem.* 2006, **49**, 6177–6196.
- 4 Maestro V<sub>9,6</sub>, Versuib 70110, Schrodinger, New York.
- 5 A. Umamaheswari, D. Pradhan, M. Hemanthkumar, *Genom. Proteom. Bioinfo.* 2010, **8**, 246–255.
- 6 W. H. Brooks, K. G. Daniel, S. S. Sung, W. C. Guida, *J. Chem. Inf. Model.* 2008, **48**, 639–645.

- 7 C. Lipinski, A. Hopkins, *Nature* 2004, **432**, 855–861.
- 8 M. Congreve, R. Carr, C. Murray, H. Jhosi, *Drug Today* 2003, **8**, 876–877.
- 9 R. A. Friesner, J. L. Banks, R. B. Murphy, J. A. Halgren, J. J. Klicic, D. T. Mainz, M. P. Repasky, E. H. Knoll, M. Shelley, J. K. Perry, D. E. Shaw, P. Francis, P. S. Shenkin, *J. Med. Chem.* 2004, **47**, 1739–1749.
- 10 T. A. Halgren, R. B. Murphy, R. A. Friesner, H. S. Beard, L. L. Frye, W. T. Pollard, J. L. Banks, *J. Med. Chem.* 2004, **47**, 1750–1759.
